# Supplementary material for: Arboreal twig-nesting ants form dominance hierarchies over nesting resources
Source: PeerJ. 2019 Nov 27;7:e8124. doi: 10.7717/peerj.8124 (PMC6884992; doi:10.7717/peerj.8124)
Supplement: Supplemental Information 2 — The total number of replications for each of the pairs of ant species. The tab “Table for supplement” includes a matrix showing the number of trials for each pair, and two columns showing species name and total number of trials for that species. [file peerj-07-8124-s002.xlsx]

## Sheet: Data
Record	Year	Data Source	Species 1	Species 2
180	2011	SMP	Camponotus abditus	Camponotus negra rojiza
192	2011	SMP	Camponotus abditus	Camponotus negra rojiza
211	2011	SMP	Camponotus abditus	Camponotus negra rojiza
181	2011	SMP	Camponotus abditus	Myrmelachista mexicana
8	2007	GLV	Camponotus abditus	Nesomyrmex echinatinodis
170	2011	SMP	Camponotus abditus	Nesomyrmex echinatinodis
188	2011	SMP	Camponotus abditus	Nesomyrmex echinatinodis
189	2011	SMP	Camponotus abditus	Nesomyrmex echinatinodis
227	2011	SMP	Camponotus abditus	Nesomyrmex echinatinodis
178	2011	SMP	Camponotus abditus	Procryptocerus hylaeus
191	2011	SMP	Camponotus abditus	Procryptocerus hylaeus
198	2011	SMP	Camponotus abditus	Procryptocerus hylaeus
199	2011	SMP	Camponotus abditus	Procryptocerus hylaeus
212	2011	SMP	Camponotus abditus	Procryptocerus hylaeus
254	2012	SMP	Camponotus abditus	Procryptocerus hylaeus
16	2007	GLV	Camponotus abditus	Pseudomyrmex ejectus
17	2007	GLV	Camponotus abditus	Pseudomyrmex ejectus
190	2011	SMP	Camponotus abditus	Pseudomyrmex ejectus
173	2011	SMP	Camponotus abditus	Pseudomyrmex elongatus
179	2011	SMP	Camponotus abditus	Pseudomyrmex PSW-53
228	2011	SMP	Camponotus abditus	Pseudomyrmex PSW-53
229	2011	SMP	Camponotus abditus	Pseudomyrmex PSW-53
25	2007	GLV	Camponotus abditus	Pseudomyrmex simplex
150	2011	SMP	Camponotus abditus	Pseudomyrmex simplex
151	2011	SMP	Camponotus abditus	Pseudomyrmex simplex
174	2011	SMP	Camponotus abditus	Pseudomyrmex simplex
200	2011	SMP	Camponotus abditus	Pseudomyrmex simplex
201	2011	SMP	Camponotus abditus	Pseudomyrmex simplex
215	2011	SMP	Camponotus abditus	Pseudomyrmex simplex
216	2011	SMP	Camponotus abditus	Pseudomyrmex simplex
231	2012	SMP	Camponotus negra rojiza	Camponotus abditus
257	2012	SMP	Camponotus negra rojiza	Myrmelachista mexicana
185	2011	SMP	Camponotus negra rojiza	Procryptocerus hylaeus
208	2011	SMP	Camponotus negra rojiza	Pseudomyrmex elongatus
209	2011	SMP	Camponotus negra rojiza	Pseudomyrmex PSW-53
230	2012	SMP	Camponotus negra rojiza	Pseudomyrmex PSW-53
235	2012	SMP	Myrmelachista mexicana	Camponotus abditus
171	2011	SMP	Myrmelachista mexicana	Nesomyrmex echinatinodis
12	2007	GLV	Myrmelachista mexicana	Procryptocerus hylaeus
175	2011	SMP	Myrmelachista mexicana	Pseudomyrmex ejectus
186	2011	SMP	Myrmelachista mexicana	Pseudomyrmex ejectus
152	2011	SMP	Myrmelachista mexicana	Pseudomyrmex PSW-53
159	2011	SMP	Myrmelachista mexicana	Pseudomyrmex PSW-53
236	2012	SMP	Myrmelachista mexicana	Pseudomyrmex PSW-53
1	2007	GLV	Nesomyrmex echinatinodis	Camponotus abditus
243	2012	SMP	Nesomyrmex echinatinodis	Camponotus abditus
183	2011	SMP	Nesomyrmex echinatinodis	Camponotus negra rojiza
234	2012	SMP	Nesomyrmex echinatinodis	Camponotus negra rojiza
137	2009	SMP	Nesomyrmex echinatinodis	Myrmelachista mexicana
138	2009	SMP	Nesomyrmex echinatinodis	Myrmelachista mexicana
184	2011	SMP	Nesomyrmex echinatinodis	Myrmelachista mexicana
161	2011	SMP	Nesomyrmex echinatinodis	Procryptocerus hylaeus
162	2011	SMP	Nesomyrmex echinatinodis	Procryptocerus hylaeus
242	2012	SMP	Nesomyrmex echinatinodis	Procryptocerus hylaeus
158	2011	SMP	Nesomyrmex echinatinodis	Pseudomyrmex ejectus
163	2011	SMP	Nesomyrmex echinatinodis	Pseudomyrmex ejectus
164	2011	SMP	Nesomyrmex echinatinodis	Pseudomyrmex ejectus
168	2011	SMP	Nesomyrmex echinatinodis	Pseudomyrmex ejectus
169	2011	SMP	Nesomyrmex echinatinodis	Pseudomyrmex ejectus
187	2011	SMP	Nesomyrmex echinatinodis	Pseudomyrmex elongatus
237	2012	SMP	Nesomyrmex echinatinodis	Pseudomyrmex elongatus
238	2012	SMP	Nesomyrmex echinatinodis	Pseudomyrmex elongatus
153	2011	SMP	Nesomyrmex echinatinodis	Pseudomyrmex PSW-53
154	2011	SMP	Nesomyrmex echinatinodis	Pseudomyrmex PSW-53
207	2011	SMP	Nesomyrmex echinatinodis	Pseudomyrmex PSW-53
213	2011	SMP	Nesomyrmex echinatinodis	Pseudomyrmex PSW-53
214	2011	SMP	Nesomyrmex echinatinodis	Pseudomyrmex PSW-53
239	2012	SMP	Nesomyrmex echinatinodis	Pseudomyrmex PSW-53
240	2012	SMP	Nesomyrmex echinatinodis	Pseudomyrmex PSW-53
241	2012	SMP	Nesomyrmex echinatinodis	Pseudomyrmex PSW-53
26	2007	GLV	Nesomyrmex echinatinodis	Pseudomyrmex simplex
27	2007	GLV	Nesomyrmex echinatinodis	Pseudomyrmex simplex
28	2007	GLV	Nesomyrmex echinatinodis	Pseudomyrmex simplex
29	2007	GLV	Nesomyrmex echinatinodis	Pseudomyrmex simplex
30	2007	GLV	Nesomyrmex echinatinodis	Pseudomyrmex simplex
31	2007	GLV	Nesomyrmex echinatinodis	Pseudomyrmex simplex
130	2009	SMP	Procryptocerus hylaeus	Camponotus abditus
131	2009	SMP	Procryptocerus hylaeus	Camponotus abditus
132	2009	SMP	Procryptocerus hylaeus	Camponotus abditus
133	2009	SMP	Procryptocerus hylaeus	Camponotus abditus
134	2009	SMP	Procryptocerus hylaeus	Camponotus abditus
233	2012	SMP	Procryptocerus hylaeus	Camponotus abditus
106	2009	SMP	Procryptocerus hylaeus	Myrmelachista mexicana
107	2009	SMP	Procryptocerus hylaeus	Myrmelachista mexicana
108	2009	SMP	Procryptocerus hylaeus	Myrmelachista mexicana
109	2009	SMP	Procryptocerus hylaeus	Myrmelachista mexicana
110	2009	SMP	Procryptocerus hylaeus	Myrmelachista mexicana
120	2009	SMP	Procryptocerus hylaeus	Myrmelachista mexicana
121	2009	SMP	Procryptocerus hylaeus	Myrmelachista mexicana
9	2007	GLV	Procryptocerus hylaeus	Nesomyrmex echinatinodis
111	2009	SMP	Procryptocerus hylaeus	Nesomyrmex echinatinodis
112	2009	SMP	Procryptocerus hylaeus	Nesomyrmex echinatinodis
113	2009	SMP	Procryptocerus hylaeus	Nesomyrmex echinatinodis
123	2009	SMP	Procryptocerus hylaeus	Nesomyrmex echinatinodis
145	2009	SMP	Procryptocerus hylaeus	Nesomyrmex echinatinodis
146	2009	SMP	Procryptocerus hylaeus	Nesomyrmex echinatinodis
155	2011	SMP	Procryptocerus hylaeus	Pseudomyrmex ejectus
156	2011	SMP	Procryptocerus hylaeus	Pseudomyrmex ejectus
157	2011	SMP	Procryptocerus hylaeus	Pseudomyrmex ejectus
122	2009	SMP	Procryptocerus hylaeus	Pseudomyrmex elongatus
129	2009	SMP	Procryptocerus hylaeus	Pseudomyrmex elongatus
144	2009	SMP	Procryptocerus hylaeus	Pseudomyrmex elongatus
197	2011	SMP	Procryptocerus hylaeus	Pseudomyrmex elongatus
105	2009	SMP	Procryptocerus hylaeus	Pseudomyrmex PSW-53
135	2009	SMP	Procryptocerus hylaeus	Pseudomyrmex PSW-53
136	2009	SMP	Procryptocerus hylaeus	Pseudomyrmex PSW-53
139	2009	SMP	Procryptocerus hylaeus	Pseudomyrmex PSW-53
140	2009	SMP	Procryptocerus hylaeus	Pseudomyrmex PSW-53
32	2007	GLV	Procryptocerus hylaeus	Pseudomyrmex simplex
78	2009	SMP	Pseudomyrmex ejectus	Camponotus abditus
79	2009	SMP	Pseudomyrmex ejectus	Camponotus abditus
115	2009	SMP	Pseudomyrmex ejectus	Camponotus abditus
141	2009	SMP	Pseudomyrmex ejectus	Camponotus abditus
142	2009	SMP	Pseudomyrmex ejectus	Camponotus abditus
143	2009	SMP	Pseudomyrmex ejectus	Camponotus abditus
232	2012	SMP	Pseudomyrmex ejectus	Camponotus abditus
80	2009	SMP	Pseudomyrmex ejectus	Camponotus negra rojiza
81	2009	SMP	Pseudomyrmex ejectus	Camponotus negra rojiza
116	2009	SMP	Pseudomyrmex ejectus	Camponotus negra rojiza
86	2009	SMP	Pseudomyrmex ejectus	Myrmelachista mexicana
119	2009	SMP	Pseudomyrmex ejectus	Myrmelachista mexicana
128	2009	SMP	Pseudomyrmex ejectus	Myrmelachista mexicana
69	2009	SMP	Pseudomyrmex ejectus	Nesomyrmex echinatinodis
124	2009	SMP	Pseudomyrmex ejectus	Nesomyrmex echinatinodis
125	2009	SMP	Pseudomyrmex ejectus	Nesomyrmex echinatinodis
126	2009	SMP	Pseudomyrmex ejectus	Nesomyrmex echinatinodis
127	2009	SMP	Pseudomyrmex ejectus	Nesomyrmex echinatinodis
68	2009	SMP	Pseudomyrmex ejectus	Procryptocerus hylaeus
75	2009	SMP	Pseudomyrmex ejectus	Procryptocerus hylaeus
76	2009	SMP	Pseudomyrmex ejectus	Procryptocerus hylaeus
77	2009	SMP	Pseudomyrmex ejectus	Procryptocerus hylaeus
89	2009	SMP	Pseudomyrmex ejectus	Procryptocerus hylaeus
149	2011	SMP	Pseudomyrmex ejectus	Procryptocerus hylaeus
43	2009	SMP	Pseudomyrmex ejectus	Pseudomyrmex PSW-53
65	2009	SMP	Pseudomyrmex ejectus	Pseudomyrmex PSW-53
66	2009	SMP	Pseudomyrmex ejectus	Pseudomyrmex PSW-53
67	2009	SMP	Pseudomyrmex ejectus	Pseudomyrmex PSW-53
72	2009	SMP	Pseudomyrmex ejectus	Pseudomyrmex PSW-53
73	2009	SMP	Pseudomyrmex ejectus	Pseudomyrmex PSW-53
74	2009	SMP	Pseudomyrmex ejectus	Pseudomyrmex PSW-53
147	2009	SMP	Pseudomyrmex ejectus	Pseudomyrmex PSW-53
33	2007	GLV	Pseudomyrmex ejectus	Pseudomyrmex simplex
34	2007	GLV	Pseudomyrmex ejectus	Pseudomyrmex simplex
35	2007	GLV	Pseudomyrmex ejectus	Pseudomyrmex simplex
249	2012	SMP	Pseudomyrmex elongatus	Camponotus negra rojiza
258	2012	SMP	Pseudomyrmex elongatus	Myrmelachista mexicana
259	2012	SMP	Pseudomyrmex elongatus	Myrmelachista mexicana
202	2011	SMP	Pseudomyrmex elongatus	Nesomyrmex echinatinodis
210	2011	SMP	Pseudomyrmex elongatus	Procryptocerus hylaeus
160	2011	SMP	Pseudomyrmex elongatus	Pseudomyrmex ejectus
255	2012	SMP	Pseudomyrmex elongatus	Pseudomyrmex ejectus
256	2012	SMP	Pseudomyrmex elongatus	Pseudomyrmex ejectus
205	2011	SMP	Pseudomyrmex elongatus	Pseudomyrmex PSW-53
206	2011	SMP	Pseudomyrmex elongatus	Pseudomyrmex PSW-53
204	2011	SMP	Pseudomyrmex filiformis	Camponotus abditus
244	2012	SMP	Pseudomyrmex filiformis	Camponotus abditus
245	2012	SMP	Pseudomyrmex filiformis	Camponotus abditus
217	2011	SMP	Pseudomyrmex filiformis	Camponotus negra rojiza
203	2011	SMP	Pseudomyrmex filiformis	Nesomyrmex echinatinodis
218	2011	SMP	Pseudomyrmex filiformis	Nesomyrmex echinatinodis
226	2011	SMP	Pseudomyrmex filiformis	Nesomyrmex echinatinodis
224	2011	SMP	Pseudomyrmex filiformis	Procryptocerus hylaeus
247	2012	SMP	Pseudomyrmex filiformis	Procryptocerus hylaeus
220	2011	SMP	Pseudomyrmex filiformis	Pseudomyrmex ejectus
248	2012	SMP	Pseudomyrmex filiformis	Pseudomyrmex ejectus
221	2011	SMP	Pseudomyrmex filiformis	Pseudomyrmex elongatus
246	2012	SMP	Pseudomyrmex filiformis	Pseudomyrmex elongatus
24	2007	GLV	Pseudomyrmex filiformis	Pseudomyrmex PSW-53
222	2011	SMP	Pseudomyrmex filiformis	Pseudomyrmex PSW-53
36	2007	GLV	Pseudomyrmex filiformis	Pseudomyrmex simplex
37	2007	GLV	Pseudomyrmex filiformis	Pseudomyrmex simplex
38	2007	GLV	Pseudomyrmex filiformis	Pseudomyrmex simplex
39	2007	GLV	Pseudomyrmex filiformis	Pseudomyrmex simplex
172	2011	SMP	Pseudomyrmex filiformis	Pseudomyrmex simplex
219	2011	SMP	Pseudomyrmex filiformis	Pseudomyrmex simplex
223	2011	SMP	Pseudomyrmex filiformis	Pseudomyrmex simplex
2	2007	GLV	Pseudomyrmex PSW-53	Camponotus abditus
3	2007	GLV	Pseudomyrmex PSW-53	Camponotus abditus
4	2007	GLV	Pseudomyrmex PSW-53	Camponotus abditus
5	2007	GLV	Pseudomyrmex PSW-53	Camponotus abditus
251	2012	SMP	Pseudomyrmex PSW-53	Camponotus abditus
252	2012	SMP	Pseudomyrmex PSW-53	Camponotus abditus
225	2011	SMP	Pseudomyrmex PSW-53	Camponotus negra rojiza
182	2011	SMP	Pseudomyrmex PSW-53	Myrmelachista mexicana
13	2007	GLV	Pseudomyrmex PSW-53	Procryptocerus hylaeus
165	2011	SMP	Pseudomyrmex PSW-53	Procryptocerus hylaeus
166	2011	SMP	Pseudomyrmex PSW-53	Procryptocerus hylaeus
167	2011	SMP	Pseudomyrmex PSW-53	Procryptocerus hylaeus
193	2011	SMP	Pseudomyrmex PSW-53	Procryptocerus hylaeus
194	2011	SMP	Pseudomyrmex PSW-53	Procryptocerus hylaeus
250	2012	SMP	Pseudomyrmex PSW-53	Procryptocerus hylaeus
18	2007	GLV	Pseudomyrmex PSW-53	Pseudomyrmex ejectus
19	2007	GLV	Pseudomyrmex PSW-53	Pseudomyrmex ejectus
20	2007	GLV	Pseudomyrmex PSW-53	Pseudomyrmex ejectus
253	2012	SMP	Pseudomyrmex PSW-53	Pseudomyrmex ejectus
40	2007	GLV	Pseudomyrmex PSW-53	Pseudomyrmex filiformis
41	2007	GLV	Pseudomyrmex PSW-53	Pseudomyrmex filiformis
42	2007	GLV	Pseudomyrmex PSW-53	Pseudomyrmex filiformis
148	2011	SMP	Pseudomyrmex PSW-53	Pseudomyrmex simplex
176	2011	SMP	Pseudomyrmex PSW-53	Pseudomyrmex simplex
177	2011	SMP	Pseudomyrmex PSW-53	Pseudomyrmex simplex
195	2011	SMP	Pseudomyrmex PSW-53	Pseudomyrmex simplex
196	2011	SMP	Pseudomyrmex PSW-53	Pseudomyrmex simplex
6	2007	GLV	Pseudomyrmex simplex	Camponotus abditus
114	2009	SMP	Pseudomyrmex simplex	Camponotus abditus
93	2009	SMP	Pseudomyrmex simplex	Camponotus negra rojiza
94	2009	SMP	Pseudomyrmex simplex	Camponotus negra rojiza
117	2009	SMP	Pseudomyrmex simplex	Camponotus negra rojiza
7	2007	GLV	Pseudomyrmex simplex	Myrmelachista mexicana
61	2009	SMP	Pseudomyrmex simplex	Myrmelachista mexicana
84	2009	SMP	Pseudomyrmex simplex	Myrmelachista mexicana
85	2009	SMP	Pseudomyrmex simplex	Myrmelachista mexicana
97	2009	SMP	Pseudomyrmex simplex	Myrmelachista mexicana
118	2009	SMP	Pseudomyrmex simplex	Myrmelachista mexicana
10	2007	GLV	Pseudomyrmex simplex	Nesomyrmex echinatinodis
11	2007	GLV	Pseudomyrmex simplex	Nesomyrmex echinatinodis
62	2009	SMP	Pseudomyrmex simplex	Nesomyrmex echinatinodis
63	2009	SMP	Pseudomyrmex simplex	Nesomyrmex echinatinodis
90	2009	SMP	Pseudomyrmex simplex	Nesomyrmex echinatinodis
95	2009	SMP	Pseudomyrmex simplex	Nesomyrmex echinatinodis
96	2009	SMP	Pseudomyrmex simplex	Nesomyrmex echinatinodis
103	2009	SMP	Pseudomyrmex simplex	Nesomyrmex echinatinodis
104	2009	SMP	Pseudomyrmex simplex	Nesomyrmex echinatinodis
14	2007	GLV	Pseudomyrmex simplex	Procryptocerus hylaeus
15	2007	GLV	Pseudomyrmex simplex	Procryptocerus hylaeus
47	2009	SMP	Pseudomyrmex simplex	Procryptocerus hylaeus
48	2009	SMP	Pseudomyrmex simplex	Procryptocerus hylaeus
49	2009	SMP	Pseudomyrmex simplex	Procryptocerus hylaeus
50	2009	SMP	Pseudomyrmex simplex	Procryptocerus hylaeus
51	2009	SMP	Pseudomyrmex simplex	Procryptocerus hylaeus
55	2009	SMP	Pseudomyrmex simplex	Procryptocerus hylaeus
87	2009	SMP	Pseudomyrmex simplex	Procryptocerus hylaeus
88	2009	SMP	Pseudomyrmex simplex	Procryptocerus hylaeus
21	2007	GLV	Pseudomyrmex simplex	Pseudomyrmex ejectus
22	2007	GLV	Pseudomyrmex simplex	Pseudomyrmex ejectus
44	2009	SMP	Pseudomyrmex simplex	Pseudomyrmex ejectus
45	2009	SMP	Pseudomyrmex simplex	Pseudomyrmex ejectus
46	2009	SMP	Pseudomyrmex simplex	Pseudomyrmex ejectus
56	2009	SMP	Pseudomyrmex simplex	Pseudomyrmex ejectus
57	2009	SMP	Pseudomyrmex simplex	Pseudomyrmex ejectus
58	2009	SMP	Pseudomyrmex simplex	Pseudomyrmex ejectus
64	2009	SMP	Pseudomyrmex simplex	Pseudomyrmex ejectus
70	2009	SMP	Pseudomyrmex simplex	Pseudomyrmex ejectus
71	2009	SMP	Pseudomyrmex simplex	Pseudomyrmex ejectus
82	2009	SMP	Pseudomyrmex simplex	Pseudomyrmex ejectus
83	2009	SMP	Pseudomyrmex simplex	Pseudomyrmex ejectus
91	2009	SMP	Pseudomyrmex simplex	Pseudomyrmex ejectus
92	2009	SMP	Pseudomyrmex simplex	Pseudomyrmex ejectus
52	2009	SMP	Pseudomyrmex simplex	Pseudomyrmex elongatus
98	2009	SMP	Pseudomyrmex simplex	Pseudomyrmex elongatus
99	2009	SMP	Pseudomyrmex simplex	Pseudomyrmex elongatus
100	2009	SMP	Pseudomyrmex simplex	Pseudomyrmex elongatus
101	2009	SMP	Pseudomyrmex simplex	Pseudomyrmex elongatus
102	2009	SMP	Pseudomyrmex simplex	Pseudomyrmex filiformis
23	2007	GLV	Pseudomyrmex simplex	Pseudomyrmex PSW-53
53	2009	SMP	Pseudomyrmex simplex	Pseudomyrmex PSW-53
54	2009	SMP	Pseudomyrmex simplex	Pseudomyrmex PSW-53
59	2009	SMP	Pseudomyrmex simplex	Pseudomyrmex PSW-53
60	2009	SMP	Pseudomyrmex simplex	Pseudomyrmex PSW-53

## Sheet: Sheet2
Row Labels	Count of Year
Camponotus abditus	58
Camponotus negra rojiza	20
Myrmelachista mexicana	32
Nesomyrmex echinatinodis	63
Procryptocerus hylaeus	70
Pseudomyrmex ejectus	72
Pseudomyrmex elongatus	26
Pseudomyrmex filiformis	26
Pseudomyrmex PSW-53	65
Pseudomyrmex simplex	86
(blank)
Grand Total	518

## Sheet: Sheet1
Record	Year	Data Source	Species 1	Species 2
180	2011	SMP	Camponotus abditus	species1
192	2011	SMP	Camponotus abditus	species1
211	2011	SMP	Camponotus abditus	species1
181	2011	SMP	Camponotus abditus	species1
8	2007	GLV	Camponotus abditus	species1
170	2011	SMP	Camponotus abditus	species1
188	2011	SMP	Camponotus abditus	species1
189	2011	SMP	Camponotus abditus	species1
227	2011	SMP	Camponotus abditus	species1
178	2011	SMP	Camponotus abditus	species1
191	2011	SMP	Camponotus abditus	species1
198	2011	SMP	Camponotus abditus	species1
199	2011	SMP	Camponotus abditus	species1
212	2011	SMP	Camponotus abditus	species1
254	2012	SMP	Camponotus abditus	species1
16	2007	GLV	Camponotus abditus	species1
17	2007	GLV	Camponotus abditus	species1
190	2011	SMP	Camponotus abditus	species1
173	2011	SMP	Camponotus abditus	species1
179	2011	SMP	Camponotus abditus	species1
228	2011	SMP	Camponotus abditus	species1
229	2011	SMP	Camponotus abditus	species1
25	2007	GLV	Camponotus abditus	species1
150	2011	SMP	Camponotus abditus	species1
151	2011	SMP	Camponotus abditus	species1
174	2011	SMP	Camponotus abditus	species1
200	2011	SMP	Camponotus abditus	species1
201	2011	SMP	Camponotus abditus	species1
215	2011	SMP	Camponotus abditus	species1
216	2011	SMP	Camponotus abditus	species1
231	2012	SMP	Camponotus negra rojiza	species1
257	2012	SMP	Camponotus negra rojiza	species1
185	2011	SMP	Camponotus negra rojiza	species1
208	2011	SMP	Camponotus negra rojiza	species1
209	2011	SMP	Camponotus negra rojiza	species1
230	2012	SMP	Camponotus negra rojiza	species1
235	2012	SMP	Myrmelachista mexicana	species1
171	2011	SMP	Myrmelachista mexicana	species1
12	2007	GLV	Myrmelachista mexicana	species1
175	2011	SMP	Myrmelachista mexicana	species1
186	2011	SMP	Myrmelachista mexicana	species1
152	2011	SMP	Myrmelachista mexicana	species1
159	2011	SMP	Myrmelachista mexicana	species1
236	2012	SMP	Myrmelachista mexicana	species1
1	2007	GLV	Nesomyrmex echinatinodis	species1
243	2012	SMP	Nesomyrmex echinatinodis	species1
183	2011	SMP	Nesomyrmex echinatinodis	species1
234	2012	SMP	Nesomyrmex echinatinodis	species1
137	2009	SMP	Nesomyrmex echinatinodis	species1
138	2009	SMP	Nesomyrmex echinatinodis	species1
184	2011	SMP	Nesomyrmex echinatinodis	species1
161	2011	SMP	Nesomyrmex echinatinodis	species1
162	2011	SMP	Nesomyrmex echinatinodis	species1
242	2012	SMP	Nesomyrmex echinatinodis	species1
158	2011	SMP	Nesomyrmex echinatinodis	species1
163	2011	SMP	Nesomyrmex echinatinodis	species1
164	2011	SMP	Nesomyrmex echinatinodis	species1
168	2011	SMP	Nesomyrmex echinatinodis	species1
169	2011	SMP	Nesomyrmex echinatinodis	species1
187	2011	SMP	Nesomyrmex echinatinodis	species1
237	2012	SMP	Nesomyrmex echinatinodis	species1
238	2012	SMP	Nesomyrmex echinatinodis	species1
153	2011	SMP	Nesomyrmex echinatinodis	species1
154	2011	SMP	Nesomyrmex echinatinodis	species1
207	2011	SMP	Nesomyrmex echinatinodis	species1
213	2011	SMP	Nesomyrmex echinatinodis	species1
214	2011	SMP	Nesomyrmex echinatinodis	species1
239	2012	SMP	Nesomyrmex echinatinodis	species1
240	2012	SMP	Nesomyrmex echinatinodis	species1
241	2012	SMP	Nesomyrmex echinatinodis	species1
26	2007	GLV	Nesomyrmex echinatinodis	species1
27	2007	GLV	Nesomyrmex echinatinodis	species1
28	2007	GLV	Nesomyrmex echinatinodis	species1
29	2007	GLV	Nesomyrmex echinatinodis	species1
30	2007	GLV	Nesomyrmex echinatinodis	species1
31	2007	GLV	Nesomyrmex echinatinodis	species1
130	2009	SMP	Procryptocerus hylaeus	species1
131	2009	SMP	Procryptocerus hylaeus	species1
132	2009	SMP	Procryptocerus hylaeus	species1
133	2009	SMP	Procryptocerus hylaeus	species1
134	2009	SMP	Procryptocerus hylaeus	species1
233	2012	SMP	Procryptocerus hylaeus	species1
106	2009	SMP	Procryptocerus hylaeus	species1
107	2009	SMP	Procryptocerus hylaeus	species1
108	2009	SMP	Procryptocerus hylaeus	species1
109	2009	SMP	Procryptocerus hylaeus	species1
110	2009	SMP	Procryptocerus hylaeus	species1
120	2009	SMP	Procryptocerus hylaeus	species1
121	2009	SMP	Procryptocerus hylaeus	species1
9	2007	GLV	Procryptocerus hylaeus	species1
111	2009	SMP	Procryptocerus hylaeus	species1
112	2009	SMP	Procryptocerus hylaeus	species1
113	2009	SMP	Procryptocerus hylaeus	species1
123	2009	SMP	Procryptocerus hylaeus	species1
145	2009	SMP	Procryptocerus hylaeus	species1
146	2009	SMP	Procryptocerus hylaeus	species1
155	2011	SMP	Procryptocerus hylaeus	species1
156	2011	SMP	Procryptocerus hylaeus	species1
157	2011	SMP	Procryptocerus hylaeus	species1
122	2009	SMP	Procryptocerus hylaeus	species1
129	2009	SMP	Procryptocerus hylaeus	species1
144	2009	SMP	Procryptocerus hylaeus	species1
197	2011	SMP	Procryptocerus hylaeus	species1
105	2009	SMP	Procryptocerus hylaeus	species1
135	2009	SMP	Procryptocerus hylaeus	species1
136	2009	SMP	Procryptocerus hylaeus	species1
139	2009	SMP	Procryptocerus hylaeus	species1
140	2009	SMP	Procryptocerus hylaeus	species1
32	2007	GLV	Procryptocerus hylaeus	species1
78	2009	SMP	Pseudomyrmex ejectus	species1
79	2009	SMP	Pseudomyrmex ejectus	species1
115	2009	SMP	Pseudomyrmex ejectus	species1
141	2009	SMP	Pseudomyrmex ejectus	species1
142	2009	SMP	Pseudomyrmex ejectus	species1
143	2009	SMP	Pseudomyrmex ejectus	species1
232	2012	SMP	Pseudomyrmex ejectus	species1
80	2009	SMP	Pseudomyrmex ejectus	species1
81	2009	SMP	Pseudomyrmex ejectus	species1
116	2009	SMP	Pseudomyrmex ejectus	species1
86	2009	SMP	Pseudomyrmex ejectus	species1
119	2009	SMP	Pseudomyrmex ejectus	species1
128	2009	SMP	Pseudomyrmex ejectus	species1
69	2009	SMP	Pseudomyrmex ejectus	species1
124	2009	SMP	Pseudomyrmex ejectus	species1
125	2009	SMP	Pseudomyrmex ejectus	species1
126	2009	SMP	Pseudomyrmex ejectus	species1
127	2009	SMP	Pseudomyrmex ejectus	species1
68	2009	SMP	Pseudomyrmex ejectus	species1
75	2009	SMP	Pseudomyrmex ejectus	species1
76	2009	SMP	Pseudomyrmex ejectus	species1
77	2009	SMP	Pseudomyrmex ejectus	species1
89	2009	SMP	Pseudomyrmex ejectus	species1
149	2011	SMP	Pseudomyrmex ejectus	species1
43	2009	SMP	Pseudomyrmex ejectus	species1
65	2009	SMP	Pseudomyrmex ejectus	species1
66	2009	SMP	Pseudomyrmex ejectus	species1
67	2009	SMP	Pseudomyrmex ejectus	species1
72	2009	SMP	Pseudomyrmex ejectus	species1
73	2009	SMP	Pseudomyrmex ejectus	species1
74	2009	SMP	Pseudomyrmex ejectus	species1
147	2009	SMP	Pseudomyrmex ejectus	species1
33	2007	GLV	Pseudomyrmex ejectus	species1
34	2007	GLV	Pseudomyrmex ejectus	species1
35	2007	GLV	Pseudomyrmex ejectus	species1
249	2012	SMP	Pseudomyrmex elongatus	species1
258	2012	SMP	Pseudomyrmex elongatus	species1
259	2012	SMP	Pseudomyrmex elongatus	species1
202	2011	SMP	Pseudomyrmex elongatus	species1
210	2011	SMP	Pseudomyrmex elongatus	species1
160	2011	SMP	Pseudomyrmex elongatus	species1
255	2012	SMP	Pseudomyrmex elongatus	species1
256	2012	SMP	Pseudomyrmex elongatus	species1
205	2011	SMP	Pseudomyrmex elongatus	species1
206	2011	SMP	Pseudomyrmex elongatus	species1
204	2011	SMP	Pseudomyrmex filiformis	species1
244	2012	SMP	Pseudomyrmex filiformis	species1
245	2012	SMP	Pseudomyrmex filiformis	species1
217	2011	SMP	Pseudomyrmex filiformis	species1
203	2011	SMP	Pseudomyrmex filiformis	species1
218	2011	SMP	Pseudomyrmex filiformis	species1
226	2011	SMP	Pseudomyrmex filiformis	species1
224	2011	SMP	Pseudomyrmex filiformis	species1
247	2012	SMP	Pseudomyrmex filiformis	species1
220	2011	SMP	Pseudomyrmex filiformis	species1
248	2012	SMP	Pseudomyrmex filiformis	species1
221	2011	SMP	Pseudomyrmex filiformis	species1
246	2012	SMP	Pseudomyrmex filiformis	species1
24	2007	GLV	Pseudomyrmex filiformis	species1
222	2011	SMP	Pseudomyrmex filiformis	species1
36	2007	GLV	Pseudomyrmex filiformis	species1
37	2007	GLV	Pseudomyrmex filiformis	species1
38	2007	GLV	Pseudomyrmex filiformis	species1
39	2007	GLV	Pseudomyrmex filiformis	species1
172	2011	SMP	Pseudomyrmex filiformis	species1
219	2011	SMP	Pseudomyrmex filiformis	species1
223	2011	SMP	Pseudomyrmex filiformis	species1
2	2007	GLV	Pseudomyrmex PSW-53	species1
3	2007	GLV	Pseudomyrmex PSW-53	species1
4	2007	GLV	Pseudomyrmex PSW-53	species1
5	2007	GLV	Pseudomyrmex PSW-53	species1
251	2012	SMP	Pseudomyrmex PSW-53	species1
252	2012	SMP	Pseudomyrmex PSW-53	species1
225	2011	SMP	Pseudomyrmex PSW-53	species1
182	2011	SMP	Pseudomyrmex PSW-53	species1
13	2007	GLV	Pseudomyrmex PSW-53	species1
165	2011	SMP	Pseudomyrmex PSW-53	species1
166	2011	SMP	Pseudomyrmex PSW-53	species1
167	2011	SMP	Pseudomyrmex PSW-53	species1
193	2011	SMP	Pseudomyrmex PSW-53	species1
194	2011	SMP	Pseudomyrmex PSW-53	species1
250	2012	SMP	Pseudomyrmex PSW-53	species1
18	2007	GLV	Pseudomyrmex PSW-53	species1
19	2007	GLV	Pseudomyrmex PSW-53	species1
20	2007	GLV	Pseudomyrmex PSW-53	species1
253	2012	SMP	Pseudomyrmex PSW-53	species1
40	2007	GLV	Pseudomyrmex PSW-53	species1
41	2007	GLV	Pseudomyrmex PSW-53	species1
42	2007	GLV	Pseudomyrmex PSW-53	species1
148	2011	SMP	Pseudomyrmex PSW-53	species1
176	2011	SMP	Pseudomyrmex PSW-53	species1
177	2011	SMP	Pseudomyrmex PSW-53	species1
195	2011	SMP	Pseudomyrmex PSW-53	species1
196	2011	SMP	Pseudomyrmex PSW-53	species1
6	2007	GLV	Pseudomyrmex simplex	species1
114	2009	SMP	Pseudomyrmex simplex	species1
93	2009	SMP	Pseudomyrmex simplex	species1
94	2009	SMP	Pseudomyrmex simplex	species1
117	2009	SMP	Pseudomyrmex simplex	species1
7	2007	GLV	Pseudomyrmex simplex	species1
61	2009	SMP	Pseudomyrmex simplex	species1
84	2009	SMP	Pseudomyrmex simplex	species1
85	2009	SMP	Pseudomyrmex simplex	species1
97	2009	SMP	Pseudomyrmex simplex	species1
118	2009	SMP	Pseudomyrmex simplex	species1
10	2007	GLV	Pseudomyrmex simplex	species1
11	2007	GLV	Pseudomyrmex simplex	species1
62	2009	SMP	Pseudomyrmex simplex	species1
63	2009	SMP	Pseudomyrmex simplex	species1
90	2009	SMP	Pseudomyrmex simplex	species1
95	2009	SMP	Pseudomyrmex simplex	species1
96	2009	SMP	Pseudomyrmex simplex	species1
103	2009	SMP	Pseudomyrmex simplex	species1
104	2009	SMP	Pseudomyrmex simplex	species1
14	2007	GLV	Pseudomyrmex simplex	species1
15	2007	GLV	Pseudomyrmex simplex	species1
47	2009	SMP	Pseudomyrmex simplex	species1
48	2009	SMP	Pseudomyrmex simplex	species1
49	2009	SMP	Pseudomyrmex simplex	species1
50	2009	SMP	Pseudomyrmex simplex	species1
51	2009	SMP	Pseudomyrmex simplex	species1
55	2009	SMP	Pseudomyrmex simplex	species1
87	2009	SMP	Pseudomyrmex simplex	species1
88	2009	SMP	Pseudomyrmex simplex	species1
21	2007	GLV	Pseudomyrmex simplex	species1
22	2007	GLV	Pseudomyrmex simplex	species1
44	2009	SMP	Pseudomyrmex simplex	species1
45	2009	SMP	Pseudomyrmex simplex	species1
46	2009	SMP	Pseudomyrmex simplex	species1
56	2009	SMP	Pseudomyrmex simplex	species1
57	2009	SMP	Pseudomyrmex simplex	species1
58	2009	SMP	Pseudomyrmex simplex	species1
64	2009	SMP	Pseudomyrmex simplex	species1
70	2009	SMP	Pseudomyrmex simplex	species1
71	2009	SMP	Pseudomyrmex simplex	species1
82	2009	SMP	Pseudomyrmex simplex	species1
83	2009	SMP	Pseudomyrmex simplex	species1
91	2009	SMP	Pseudomyrmex simplex	species1
92	2009	SMP	Pseudomyrmex simplex	species1
52	2009	SMP	Pseudomyrmex simplex	species1
98	2009	SMP	Pseudomyrmex simplex	species1
99	2009	SMP	Pseudomyrmex simplex	species1
100	2009	SMP	Pseudomyrmex simplex	species1
101	2009	SMP	Pseudomyrmex simplex	species1
102	2009	SMP	Pseudomyrmex simplex	species1
23	2007	GLV	Pseudomyrmex simplex	species1
53	2009	SMP	Pseudomyrmex simplex	species1
54	2009	SMP	Pseudomyrmex simplex	species1
59	2009	SMP	Pseudomyrmex simplex	species1
60	2009	SMP	Pseudomyrmex simplex	species1
180	2011	SMP	Camponotus negra rojiza	Species2
192	2011	SMP	Camponotus negra rojiza	Species2
211	2011	SMP	Camponotus negra rojiza	Species2
181	2011	SMP	Myrmelachista mexicana	Species2
8	2007	GLV	Nesomyrmex echinatinodis	Species2
170	2011	SMP	Nesomyrmex echinatinodis	Species2
188	2011	SMP	Nesomyrmex echinatinodis	Species2
189	2011	SMP	Nesomyrmex echinatinodis	Species2
227	2011	SMP	Nesomyrmex echinatinodis	Species2
178	2011	SMP	Procryptocerus hylaeus	Species2
191	2011	SMP	Procryptocerus hylaeus	Species2
198	2011	SMP	Procryptocerus hylaeus	Species2
199	2011	SMP	Procryptocerus hylaeus	Species2
212	2011	SMP	Procryptocerus hylaeus	Species2
254	2012	SMP	Procryptocerus hylaeus	Species2
16	2007	GLV	Pseudomyrmex ejectus	Species2
17	2007	GLV	Pseudomyrmex ejectus	Species2
190	2011	SMP	Pseudomyrmex ejectus	Species2
173	2011	SMP	Pseudomyrmex elongatus	Species2
179	2011	SMP	Pseudomyrmex PSW-53	Species2
228	2011	SMP	Pseudomyrmex PSW-53	Species2
229	2011	SMP	Pseudomyrmex PSW-53	Species2
25	2007	GLV	Pseudomyrmex simplex	Species2
150	2011	SMP	Pseudomyrmex simplex	Species2
151	2011	SMP	Pseudomyrmex simplex	Species2
174	2011	SMP	Pseudomyrmex simplex	Species2
200	2011	SMP	Pseudomyrmex simplex	Species2
201	2011	SMP	Pseudomyrmex simplex	Species2
215	2011	SMP	Pseudomyrmex simplex	Species2
216	2011	SMP	Pseudomyrmex simplex	Species2
231	2012	SMP	Camponotus abditus	Species2
257	2012	SMP	Myrmelachista mexicana	Species2
185	2011	SMP	Procryptocerus hylaeus	Species2
208	2011	SMP	Pseudomyrmex elongatus	Species2
209	2011	SMP	Pseudomyrmex PSW-53	Species2
230	2012	SMP	Pseudomyrmex PSW-53	Species2
235	2012	SMP	Camponotus abditus	Species2
171	2011	SMP	Nesomyrmex echinatinodis	Species2
12	2007	GLV	Procryptocerus hylaeus	Species2
175	2011	SMP	Pseudomyrmex ejectus	Species2
186	2011	SMP	Pseudomyrmex ejectus	Species2
152	2011	SMP	Pseudomyrmex PSW-53	Species2
159	2011	SMP	Pseudomyrmex PSW-53	Species2
236	2012	SMP	Pseudomyrmex PSW-53	Species2
1	2007	GLV	Camponotus abditus	Species2
243	2012	SMP	Camponotus abditus	Species2
183	2011	SMP	Camponotus negra rojiza	Species2
234	2012	SMP	Camponotus negra rojiza	Species2
137	2009	SMP	Myrmelachista mexicana	Species2
138	2009	SMP	Myrmelachista mexicana	Species2
184	2011	SMP	Myrmelachista mexicana	Species2
161	2011	SMP	Procryptocerus hylaeus	Species2
162	2011	SMP	Procryptocerus hylaeus	Species2
242	2012	SMP	Procryptocerus hylaeus	Species2
158	2011	SMP	Pseudomyrmex ejectus	Species2
163	2011	SMP	Pseudomyrmex ejectus	Species2
164	2011	SMP	Pseudomyrmex ejectus	Species2
168	2011	SMP	Pseudomyrmex ejectus	Species2
169	2011	SMP	Pseudomyrmex ejectus	Species2
187	2011	SMP	Pseudomyrmex elongatus	Species2
237	2012	SMP	Pseudomyrmex elongatus	Species2
238	2012	SMP	Pseudomyrmex elongatus	Species2
153	2011	SMP	Pseudomyrmex PSW-53	Species2
154	2011	SMP	Pseudomyrmex PSW-53	Species2
207	2011	SMP	Pseudomyrmex PSW-53	Species2
213	2011	SMP	Pseudomyrmex PSW-53	Species2
214	2011	SMP	Pseudomyrmex PSW-53	Species2
239	2012	SMP	Pseudomyrmex PSW-53	Species2
240	2012	SMP	Pseudomyrmex PSW-53	Species2
241	2012	SMP	Pseudomyrmex PSW-53	Species2
26	2007	GLV	Pseudomyrmex simplex	Species2
27	2007	GLV	Pseudomyrmex simplex	Species2
28	2007	GLV	Pseudomyrmex simplex	Species2
29	2007	GLV	Pseudomyrmex simplex	Species2
30	2007	GLV	Pseudomyrmex simplex	Species2
31	2007	GLV	Pseudomyrmex simplex	Species2
130	2009	SMP	Camponotus abditus	Species2
131	2009	SMP	Camponotus abditus	Species2
132	2009	SMP	Camponotus abditus	Species2
133	2009	SMP	Camponotus abditus	Species2
134	2009	SMP	Camponotus abditus	Species2
233	2012	SMP	Camponotus abditus	Species2
106	2009	SMP	Myrmelachista mexicana	Species2
107	2009	SMP	Myrmelachista mexicana	Species2
108	2009	SMP	Myrmelachista mexicana	Species2
109	2009	SMP	Myrmelachista mexicana	Species2
110	2009	SMP	Myrmelachista mexicana	Species2
120	2009	SMP	Myrmelachista mexicana	Species2
121	2009	SMP	Myrmelachista mexicana	Species2
9	2007	GLV	Nesomyrmex echinatinodis	Species2
111	2009	SMP	Nesomyrmex echinatinodis	Species2
112	2009	SMP	Nesomyrmex echinatinodis	Species2
113	2009	SMP	Nesomyrmex echinatinodis	Species2
123	2009	SMP	Nesomyrmex echinatinodis	Species2
145	2009	SMP	Nesomyrmex echinatinodis	Species2
146	2009	SMP	Nesomyrmex echinatinodis	Species2
155	2011	SMP	Pseudomyrmex ejectus	Species2
156	2011	SMP	Pseudomyrmex ejectus	Species2
157	2011	SMP	Pseudomyrmex ejectus	Species2
122	2009	SMP	Pseudomyrmex elongatus	Species2
129	2009	SMP	Pseudomyrmex elongatus	Species2
144	2009	SMP	Pseudomyrmex elongatus	Species2
197	2011	SMP	Pseudomyrmex elongatus	Species2
105	2009	SMP	Pseudomyrmex PSW-53	Species2
135	2009	SMP	Pseudomyrmex PSW-53	Species2
136	2009	SMP	Pseudomyrmex PSW-53	Species2
139	2009	SMP	Pseudomyrmex PSW-53	Species2
140	2009	SMP	Pseudomyrmex PSW-53	Species2
32	2007	GLV	Pseudomyrmex simplex	Species2
78	2009	SMP	Camponotus abditus	Species2
79	2009	SMP	Camponotus abditus	Species2
115	2009	SMP	Camponotus abditus	Species2
141	2009	SMP	Camponotus abditus	Species2
142	2009	SMP	Camponotus abditus	Species2
143	2009	SMP	Camponotus abditus	Species2
232	2012	SMP	Camponotus abditus	Species2
80	2009	SMP	Camponotus negra rojiza	Species2
81	2009	SMP	Camponotus negra rojiza	Species2
116	2009	SMP	Camponotus negra rojiza	Species2
86	2009	SMP	Myrmelachista mexicana	Species2
119	2009	SMP	Myrmelachista mexicana	Species2
128	2009	SMP	Myrmelachista mexicana	Species2
69	2009	SMP	Nesomyrmex echinatinodis	Species2
124	2009	SMP	Nesomyrmex echinatinodis	Species2
125	2009	SMP	Nesomyrmex echinatinodis	Species2
126	2009	SMP	Nesomyrmex echinatinodis	Species2
127	2009	SMP	Nesomyrmex echinatinodis	Species2
68	2009	SMP	Procryptocerus hylaeus	Species2
75	2009	SMP	Procryptocerus hylaeus	Species2
76	2009	SMP	Procryptocerus hylaeus	Species2
77	2009	SMP	Procryptocerus hylaeus	Species2
89	2009	SMP	Procryptocerus hylaeus	Species2
149	2011	SMP	Procryptocerus hylaeus	Species2
43	2009	SMP	Pseudomyrmex PSW-53	Species2
65	2009	SMP	Pseudomyrmex PSW-53	Species2
66	2009	SMP	Pseudomyrmex PSW-53	Species2
67	2009	SMP	Pseudomyrmex PSW-53	Species2
72	2009	SMP	Pseudomyrmex PSW-53	Species2
73	2009	SMP	Pseudomyrmex PSW-53	Species2
74	2009	SMP	Pseudomyrmex PSW-53	Species2
147	2009	SMP	Pseudomyrmex PSW-53	Species2
33	2007	GLV	Pseudomyrmex simplex	Species2
34	2007	GLV	Pseudomyrmex simplex	Species2
35	2007	GLV	Pseudomyrmex simplex	Species2
249	2012	SMP	Camponotus negra rojiza	Species2
258	2012	SMP	Myrmelachista mexicana	Species2
259	2012	SMP	Myrmelachista mexicana	Species2
202	2011	SMP	Nesomyrmex echinatinodis	Species2
210	2011	SMP	Procryptocerus hylaeus	Species2
160	2011	SMP	Pseudomyrmex ejectus	Species2
255	2012	SMP	Pseudomyrmex ejectus	Species2
256	2012	SMP	Pseudomyrmex ejectus	Species2
205	2011	SMP	Pseudomyrmex PSW-53	Species2
206	2011	SMP	Pseudomyrmex PSW-53	Species2
204	2011	SMP	Camponotus abditus	Species2
244	2012	SMP	Camponotus abditus	Species2
245	2012	SMP	Camponotus abditus	Species2
217	2011	SMP	Camponotus negra rojiza	Species2
203	2011	SMP	Nesomyrmex echinatinodis	Species2
218	2011	SMP	Nesomyrmex echinatinodis	Species2
226	2011	SMP	Nesomyrmex echinatinodis	Species2
224	2011	SMP	Procryptocerus hylaeus	Species2
247	2012	SMP	Procryptocerus hylaeus	Species2
220	2011	SMP	Pseudomyrmex ejectus	Species2
248	2012	SMP	Pseudomyrmex ejectus	Species2
221	2011	SMP	Pseudomyrmex elongatus	Species2
246	2012	SMP	Pseudomyrmex elongatus	Species2
24	2007	GLV	Pseudomyrmex PSW-53	Species2
222	2011	SMP	Pseudomyrmex PSW-53	Species2
36	2007	GLV	Pseudomyrmex simplex	Species2
37	2007	GLV	Pseudomyrmex simplex	Species2
38	2007	GLV	Pseudomyrmex simplex	Species2
39	2007	GLV	Pseudomyrmex simplex	Species2
172	2011	SMP	Pseudomyrmex simplex	Species2
219	2011	SMP	Pseudomyrmex simplex	Species2
223	2011	SMP	Pseudomyrmex simplex	Species2
2	2007	GLV	Camponotus abditus	Species2
3	2007	GLV	Camponotus abditus	Species2
4	2007	GLV	Camponotus abditus	Species2
5	2007	GLV	Camponotus abditus	Species2
251	2012	SMP	Camponotus abditus	Species2
252	2012	SMP	Camponotus abditus	Species2
225	2011	SMP	Camponotus negra rojiza	Species2
182	2011	SMP	Myrmelachista mexicana	Species2
13	2007	GLV	Procryptocerus hylaeus	Species2
165	2011	SMP	Procryptocerus hylaeus	Species2
166	2011	SMP	Procryptocerus hylaeus	Species2
167	2011	SMP	Procryptocerus hylaeus	Species2
193	2011	SMP	Procryptocerus hylaeus	Species2
194	2011	SMP	Procryptocerus hylaeus	Species2
250	2012	SMP	Procryptocerus hylaeus	Species2
18	2007	GLV	Pseudomyrmex ejectus	Species2
19	2007	GLV	Pseudomyrmex ejectus	Species2
20	2007	GLV	Pseudomyrmex ejectus	Species2
253	2012	SMP	Pseudomyrmex ejectus	Species2
40	2007	GLV	Pseudomyrmex filiformis	Species2
41	2007	GLV	Pseudomyrmex filiformis	Species2
42	2007	GLV	Pseudomyrmex filiformis	Species2
148	2011	SMP	Pseudomyrmex simplex	Species2
176	2011	SMP	Pseudomyrmex simplex	Species2
177	2011	SMP	Pseudomyrmex simplex	Species2
195	2011	SMP	Pseudomyrmex simplex	Species2
196	2011	SMP	Pseudomyrmex simplex	Species2
6	2007	GLV	Camponotus abditus	Species2
114	2009	SMP	Camponotus abditus	Species2
93	2009	SMP	Camponotus negra rojiza	Species2
94	2009	SMP	Camponotus negra rojiza	Species2
117	2009	SMP	Camponotus negra rojiza	Species2
7	2007	GLV	Myrmelachista mexicana	Species2
61	2009	SMP	Myrmelachista mexicana	Species2
84	2009	SMP	Myrmelachista mexicana	Species2
85	2009	SMP	Myrmelachista mexicana	Species2
97	2009	SMP	Myrmelachista mexicana	Species2
118	2009	SMP	Myrmelachista mexicana	Species2
10	2007	GLV	Nesomyrmex echinatinodis	Species2
11	2007	GLV	Nesomyrmex echinatinodis	Species2
62	2009	SMP	Nesomyrmex echinatinodis	Species2
63	2009	SMP	Nesomyrmex echinatinodis	Species2
90	2009	SMP	Nesomyrmex echinatinodis	Species2
95	2009	SMP	Nesomyrmex echinatinodis	Species2
96	2009	SMP	Nesomyrmex echinatinodis	Species2
103	2009	SMP	Nesomyrmex echinatinodis	Species2
104	2009	SMP	Nesomyrmex echinatinodis	Species2
14	2007	GLV	Procryptocerus hylaeus	Species2
15	2007	GLV	Procryptocerus hylaeus	Species2
47	2009	SMP	Procryptocerus hylaeus	Species2
48	2009	SMP	Procryptocerus hylaeus	Species2
49	2009	SMP	Procryptocerus hylaeus	Species2
50	2009	SMP	Procryptocerus hylaeus	Species2
51	2009	SMP	Procryptocerus hylaeus	Species2
55	2009	SMP	Procryptocerus hylaeus	Species2
87	2009	SMP	Procryptocerus hylaeus	Species2
88	2009	SMP	Procryptocerus hylaeus	Species2
21	2007	GLV	Pseudomyrmex ejectus	Species2
22	2007	GLV	Pseudomyrmex ejectus	Species2
44	2009	SMP	Pseudomyrmex ejectus	Species2
45	2009	SMP	Pseudomyrmex ejectus	Species2
46	2009	SMP	Pseudomyrmex ejectus	Species2
56	2009	SMP	Pseudomyrmex ejectus	Species2
57	2009	SMP	Pseudomyrmex ejectus	Species2
58	2009	SMP	Pseudomyrmex ejectus	Species2
64	2009	SMP	Pseudomyrmex ejectus	Species2
70	2009	SMP	Pseudomyrmex ejectus	Species2
71	2009	SMP	Pseudomyrmex ejectus	Species2
82	2009	SMP	Pseudomyrmex ejectus	Species2
83	2009	SMP	Pseudomyrmex ejectus	Species2
91	2009	SMP	Pseudomyrmex ejectus	Species2
92	2009	SMP	Pseudomyrmex ejectus	Species2
52	2009	SMP	Pseudomyrmex elongatus	Species2
98	2009	SMP	Pseudomyrmex elongatus	Species2
99	2009	SMP	Pseudomyrmex elongatus	Species2
100	2009	SMP	Pseudomyrmex elongatus	Species2
101	2009	SMP	Pseudomyrmex elongatus	Species2
102	2009	SMP	Pseudomyrmex filiformis	Species2
23	2007	GLV	Pseudomyrmex PSW-53	Species2
53	2009	SMP	Pseudomyrmex PSW-53	Species2
54	2009	SMP	Pseudomyrmex PSW-53	Species2
59	2009	SMP	Pseudomyrmex PSW-53	Species2
60	2009	SMP	Pseudomyrmex PSW-53	Species2

## Sheet: pivot
Count of Year	Column Labels
Row Labels	Camponotus abditus	Camponotus negra rojiza	Myrmelachista mexicana	Nesomyrmex echinatinodis	Procryptocerus hylaeus	Pseudomyrmex ejectus	Pseudomyrmex elongatus	Pseudomyrmex filiformis	Pseudomyrmex PSW-53	Pseudomyrmex simplex	(blank)	Grand Total
Camponotus abditus		3	1	5	6	3	1		3	8		30
Camponotus negra rojiza	1		1		1		1		2			6
Myrmelachista mexicana	1			1	1	2			3			8
Nesomyrmex echinatinodis	2	2	3		3	5	3		8	6		32
Procryptocerus hylaeus	6		7	7		3	4		5	1		33
Pseudomyrmex ejectus	7	3	3	5	6				8	3		35
Pseudomyrmex elongatus		1	2	1	1	3			2			10
Pseudomyrmex filiformis	3	1		3	2	2	2		2	7		22
Pseudomyrmex PSW-53	6	1	1		7	4		3		5		27
Pseudomyrmex simplex	2	3	6	9	10	15	5	1	5			56
(blank)
Grand Total	28	14	24	31	37	37	16	4	38	30		259

## Sheet: table
	Camponotus abditus	Camponotus negra rojiza	Myrmelachista mexicana	Nesomyrmex echinatinodis	Procryptocerus hylaeus	Pseudomyrmex ejectus	Pseudomyrmex elongatus	Pseudomyrmex filiformis	Pseudomyrmex PSW-53	Pseudomyrmex simplex
Camponotus abditus
Camponotus negra rojiza	1
Myrmelachista mexicana	1
Nesomyrmex echinatinodis	2	2	3
Procryptocerus hylaeus	6		7	7
Pseudomyrmex ejectus	7	3	3	5	6
Pseudomyrmex elongatus		1	2	1	1	3
Pseudomyrmex filiformis	3	1		3	2	2	2
Pseudomyrmex PSW-53	6	1	1		7	4		3
Pseudomyrmex simplex	2	3	6	9	10	15	5	1	5
	Camponotus abditus	Camponotus negra rojiza	Myrmelachista mexicana	Nesomyrmex echinatinodis	Procryptocerus hylaeus	Pseudomyrmex ejectus	Pseudomyrmex elongatus	Pseudomyrmex filiformis	Pseudomyrmex PSW-53	Pseudomyrmex simplex
Camponotus abditus
Camponotus negra rojiza	3
Myrmelachista mexicana	1	1
Nesomyrmex echinatinodis	5		1
Procryptocerus hylaeus	6	1	1	3
Pseudomyrmex ejectus	3		2	5	3
Pseudomyrmex elongatus	1	1		3	4
Pseudomyrmex filiformis
Pseudomyrmex PSW-53	3	2	3	8	5	8	2	2
Pseudomyrmex simplex	8			6	1	3		7	5
	Camponotus abditus	Camponotus negra rojiza	Myrmelachista mexicana	Nesomyrmex echinatinodis	Procryptocerus hylaeus	Pseudomyrmex ejectus	Pseudomyrmex elongatus	Pseudomyrmex filiformis	Pseudomyrmex PSW-53	Pseudomyrmex simplex
Camponotus abditus
Camponotus negra rojiza	4
Myrmelachista mexicana	2	1
Nesomyrmex echinatinodis	7	2	4
Procryptocerus hylaeus	12	1	8	10
Pseudomyrmex ejectus	10	3	5	10	9
Pseudomyrmex elongatus	1	2	2	4	5	3
Pseudomyrmex filiformis	3	1	0	3	2	2	2
Pseudomyrmex PSW-53	9	3	4	8	12	12	2	5
Pseudomyrmex simplex	10	3	6	15	11	18	5	8	10

## Sheet: Table For Supplement
	Camponotus abditus	Camponotus sp. 1	Myrmelachista mexicana	Nesomyrmex echinatinodis	Procryptocerus scabriusculus	Pseudomyrmex ejectus	Pseudomyrmex elongatus	Pseudomyrmex filiformis	Pseudomyrmex PSW-53
Camponotus abditus
Camponotus sp. 1	4
Myrmelachista mexicana	2	1
Nesomyrmex echinatinodis	7	2	4
Procryptocerus scabriusculus	12	1	8	10
Pseudomyrmex ejectus	10	3	5	10	9
Pseudomyrmex elongatus	1	2	2	4	5	3
Pseudomyrmex filiformis	3	1	0	3	2	2	2
Pseudomyrmex PSW-53	9	3	4	8	12	12	2	5
Pseudomyrmex simplex	10	3	6	15	11	18	5	8	10
Species name	Total Trials for each species
Camponotus abditus	58
Camponotus sp. 1	20
Myrmelachista mexicana	32
Nesomyrmex echinatinodis	63
Procryptocerus scabriusculus	70
Pseudomyrmex ejectus	72
Pseudomyrmex elongatus	26
Pseudomyrmex filiformis	26
Pseudomyrmex PSW-53	65
Pseudomyrmex simplex	86
